# Supplementary material for: Perfluorocarbon Nanodroplets as Potential Nanocarriers for Brain Delivery Assisted by Focused Ultrasound-Mediated Blood–Brain Barrier Disruption
Source: MDPI journal article supplement (doi:10.3390/pharmaceutics14071498), 2022-07-19
Supplement: s1 [file s1]

# Supplementary Materials

## Perfluorocarbon Nanodroplets as Potential Nanocarriers for Brain Delivery Assisted by Focused Ultrasound-Mediated Blood–Brain Barrier Disruption

Charlotte Bérard <sup>1,†</sup>, Stéphane Desgranges <sup>2,†</sup>, Noé Dumas <sup>3</sup>, Anthony Novell <sup>4</sup>, Benoît Larrat <sup>5</sup>, Mourad Hamimed <sup>6</sup>, Nicolas Taulier <sup>7</sup>, Marie-Anne Estève <sup>1,\*</sup>, Florian Correard <sup>1,‡</sup> and Christiane Contino-Pépin <sup>2,\*‡</sup>

<sup>1</sup> Aix Marseille Univ, APHM, CNRS, INP, Inst Neurophysiopathol, Hôpital Timone, Service Pharmacie, Marseille, France; charlotte.berard@ap-hm.fr (C.B.); florian.correard@univ-amu.fr (F.C.)

<sup>2</sup> Avignon Université, Unité Propre de Recherche et d'Innovation, Équipe Systèmes Amphiphiles bioactifs et Formulations Eco-compatibles, 84000 Avignon, France; stephane.desgranges@univ-avignon.fr (S.D.)

<sup>3</sup> Aix Marseille Univ, CNRS, INP, Inst Neurophysiopathol, Marseille, France; noe.dumas@gmail.com (N.D.)

<sup>4</sup> Université Paris-Saclay, CEA, CNRS, Inserm, BioMaps, Service Hospitalier Frédéric Joliot, 91401 Orsay, France; anthony.novell@universite-paris-saclay.fr (A.N.)

<sup>5</sup> Université Paris Saclay, CEA, CNRS, NeuroSpin / BAOBAB, 91191 Gif-sur-Yvette, France; benoit.larrat@cea.fr (B.L.)

<sup>6</sup> Aix Marseille Univ, CNRS, INSERM, Institut Paoli-Calmettes, CRCM, SMARTc Unit, COMPO Inria – Inserm project team, Marseille, France; mourad.hamimed@univ-amu.fr (M.H.)

<sup>7</sup> Sorbonne Université, CNRS, INSERM, Laboratoire d'Imagerie Biomédicale—LIB, 75006 Paris, France; nicolas.taulier@sorbonne-universite.fr (N.T.)

\* Correspondence: marie-anne.esteve@univ-amu.fr (M.-A.E.); christine.pepin@univ-avignon.fr (C.C.-P.)

† These authors contributed equally to this work.

‡ These authors contributed equally to this work.

**Table S1.** Titration of oil and PFOB by HPLC and <sup>19</sup>F-NMR before and after emulsion filtration, respectively.

|                                                          | ATBC<br>Before filtration | ATBC<br>After filtration | C-90<br>Before filtration | C-90<br>After filtration |
|----------------------------------------------------------|---------------------------|--------------------------|---------------------------|--------------------------|
| PFOB %<br>(v/v)                                          | 3.92±0.25                 | 3.88±0.41                | 3.88±0.29                 | 3.75±0.16                |
| Oil µl mL <sup>-1a</sup>                                 | 4.53±0.16                 | 3.45±0.09                | 8.13±0.07                 | 7.38±0.25                |
| % (v/v) of oil<br>in Φ <sub>dispersed</sub> <sup>b</sup> | 10.04±0.16                | 8.22±0.45                | 17.4±0.77                 | 16.2±0.37                |

<sup>a</sup>µL mL<sup>-1</sup> of emulsion; <sup>b</sup>dispersed phase (Φ<sub>dispersed</sub> = V<sub>oil</sub> + V<sub>PFOB</sub>).

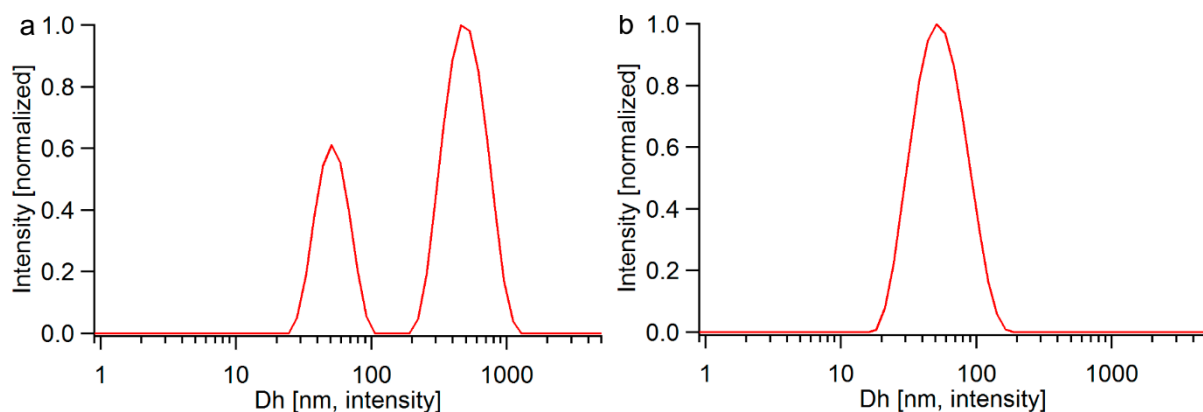

**Figure S1.** DLS of emulsion with 10% ATBC before (a) and after (b) filtration (Intensity weighted distribution).

**Table S2.** Freeze-drying assay with a Fv of 4.7% (with 5% ATBC) and with a Fv of 9.1% (no oil).

|                                        | % (w/v) <sup>a</sup> of Trehalose | Dh [nm] |         | S [Sf/Si] <sup>b</sup> |         | % [v/v] PFOB remaining |            |
|----------------------------------------|-----------------------------------|---------|---------|------------------------|---------|------------------------|------------|
|                                        |                                   | No oil  | 5% ATBC | No oil                 | 5% ATBC | No oil                 | 5% ATBC    |
| Baseline formulation before FD process | 0                                 | 63±1    | 52±2    |                        |         |                        |            |
| Baseline formulation after FD process  | 0                                 | 159±5   | 77±18   | 2.52                   | 1.50    | 74.0±5.5%              | 101.4±1.4% |
|                                        | 5%                                | 77±3    | 54±4    | 1.22                   | 1.05    | 89.1±1.8%              | 104.4±3.6% |
|                                        | 10%                               | 75±4    | 55±3    | 1.20                   | 1.06    | 82.7±4.8%              | 99.9±4.7%  |
|                                        | 15%                               | 78±5    | 58±3    | 1.24                   | 1.13    | 84.9±4.3%              | 93.9±8.8%  |
|                                        | 20%                               | 82±3    | 58±4    | 1.30                   | 1.12    | 78.4±4.4%              | 100.3±3.1% |
|                                        | 25%                               | 85±3    | 60±4    | 1.34                   | 1.16    | 78.7±0.3%              | 91.0±9.9%  |

<sup>a</sup> % of Trehalose after emulsion rehydration; <sup>b</sup> Si: Droplet Dh after preparation ( $T_0$ ), Sf: Droplet Dh after rehydration.

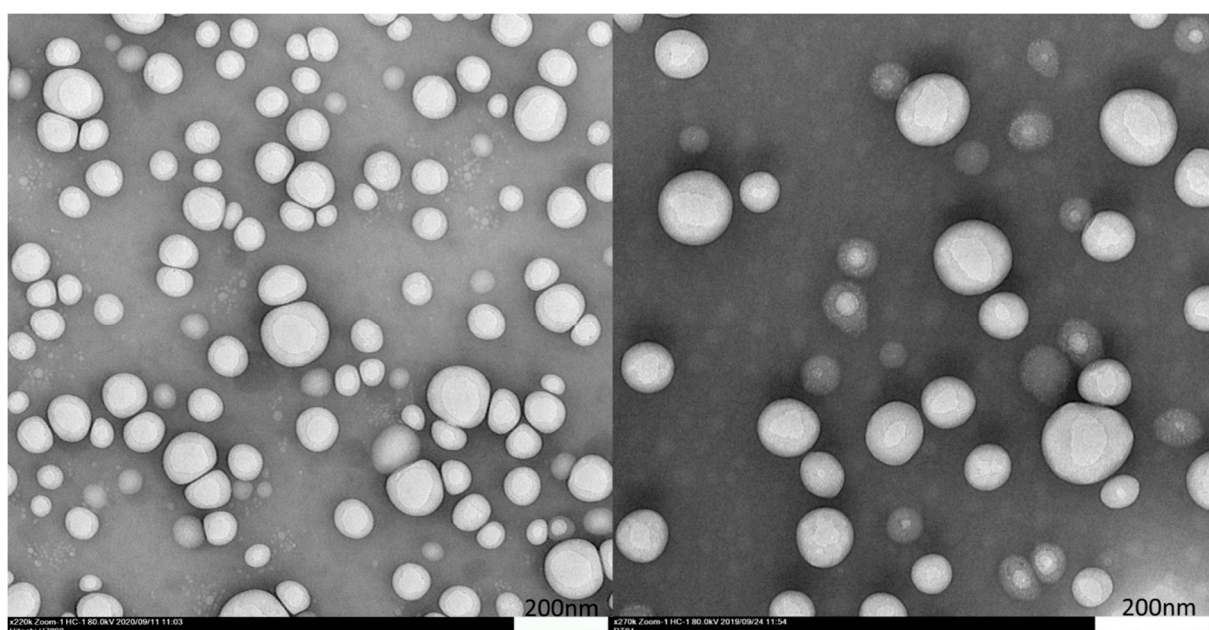

**Figure S2.** TEM images of emulsion after rehydration: STE emulsion ( $75 \pm 24$  nm) (left); DTE emulsion ( $86 \pm 23$  nm) (right). Size determined using Image J.

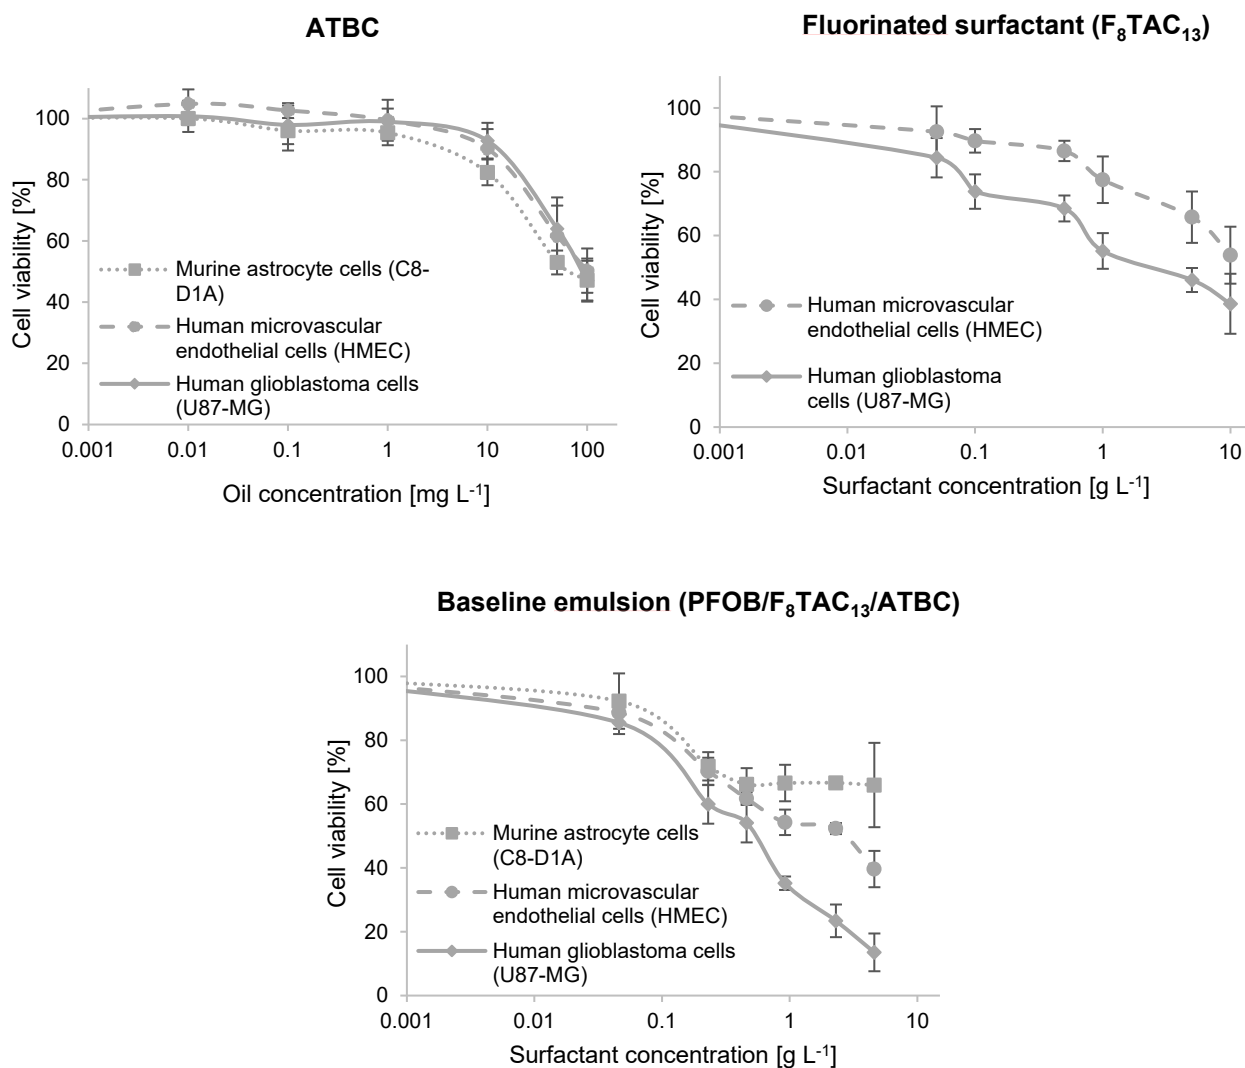

**Figure S3.** *In vitro* biocompatibility assessment of nanoemulsion and its components by MTT assay on three cell lines incubated for 72 h with ATBC (0.01 - 100 mg L<sup>-1</sup>) (a), F8TAC<sub>13</sub> surfactant (0.05 - 10 g L<sup>-1</sup>) (b) and baseline emulsion (0.046 - 4.6 g L<sup>-1</sup> of F8TAC<sub>13</sub>) (c). The values are expressed as mean  $\pm$  SD (n = 3). MTT, 3-(4,5-dimethylthiazol-2-yl)-2,5-diphenyltetrazolium bromide.

**Table S3.** Summary of PFOB concentrations in blood assessed by <sup>19</sup>F-NMR for each sampling time-point (21 records below the LLOQ were excluded: one mouse at the 24 h sampling point and all mice at the 48 h to 14 days sampling points).

| Time [h] | n              | PFOB concentration [ $\mu\text{L mL}^{-1}$ blood] |       |       |       |      |
|----------|----------------|---------------------------------------------------|-------|-------|-------|------|
|          |                | median                                            | Q1    | Q3    | mean  | SD   |
| 0.083    | 5              | 21.66                                             | 18.71 | 21.79 | 20.37 | 2.38 |
| 0.25     | 5              | 22.50                                             | 22.38 | 24.75 | 23.08 | 1.89 |
| 0.5      | 5              | 24.23                                             | 22.70 | 25.38 | 24.00 | 1.91 |
| 1        | 5              | 22.51                                             | 21.70 | 23.34 | 20.49 | 5.80 |
| 2        | 5              | 25.90                                             | 24.20 | 27.27 | 26.10 | 2.80 |
| 4        | 5              | 18.70                                             | 18.37 | 19.89 | 19.16 | 1.40 |
| 8        | 5              | 20.42                                             | 16.29 | 21.36 | 19.15 | 2.67 |
| 16       | 3 <sup>a</sup> | 3.63                                              | 3.46  | 3.81  | 3.64  | 0.35 |
| 24       | 4              | 0.58                                              | 0.21  | 1.46  | 1.09  | 1.32 |

<sup>a</sup> 2 mice died.

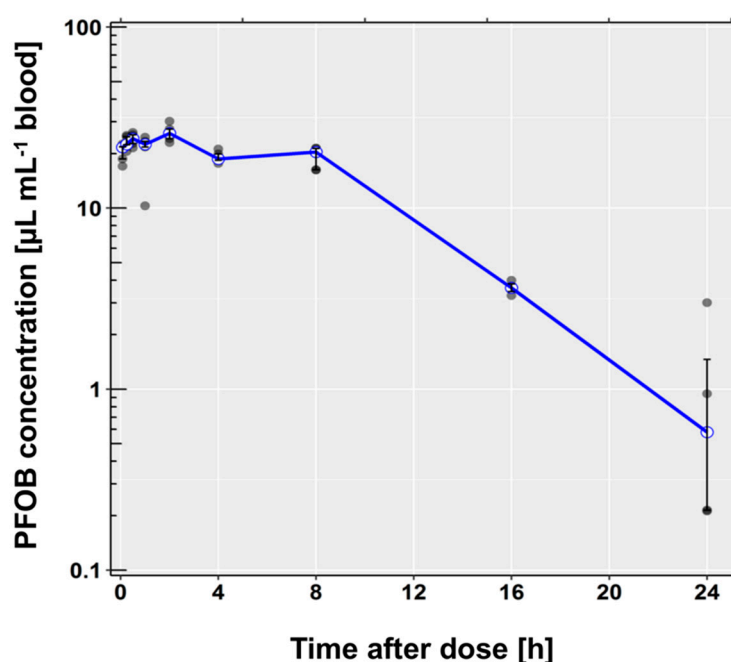

**Figure S4.** Median (interquartile range) concentration-time profile of PFOB in blood on semi-logarithmic scale, overlaid with observed data points, after blood sampling 5, 15, 30, 60 min, 2, 4, 8, 16 and 24 h following a retro-orbital i.v. administration of a single dose of 300  $\mu\text{L}$  of the concentrated emulsion.
